# Supplementary material
Source: Springer Nature journal article supplement (https://www.springermedizin.de/resource/supplementary/12943_2014_1285_MOESM5_ESM.pdf/9553146)
Supplement: MOESM5 [file 9553146]

Additional file 5

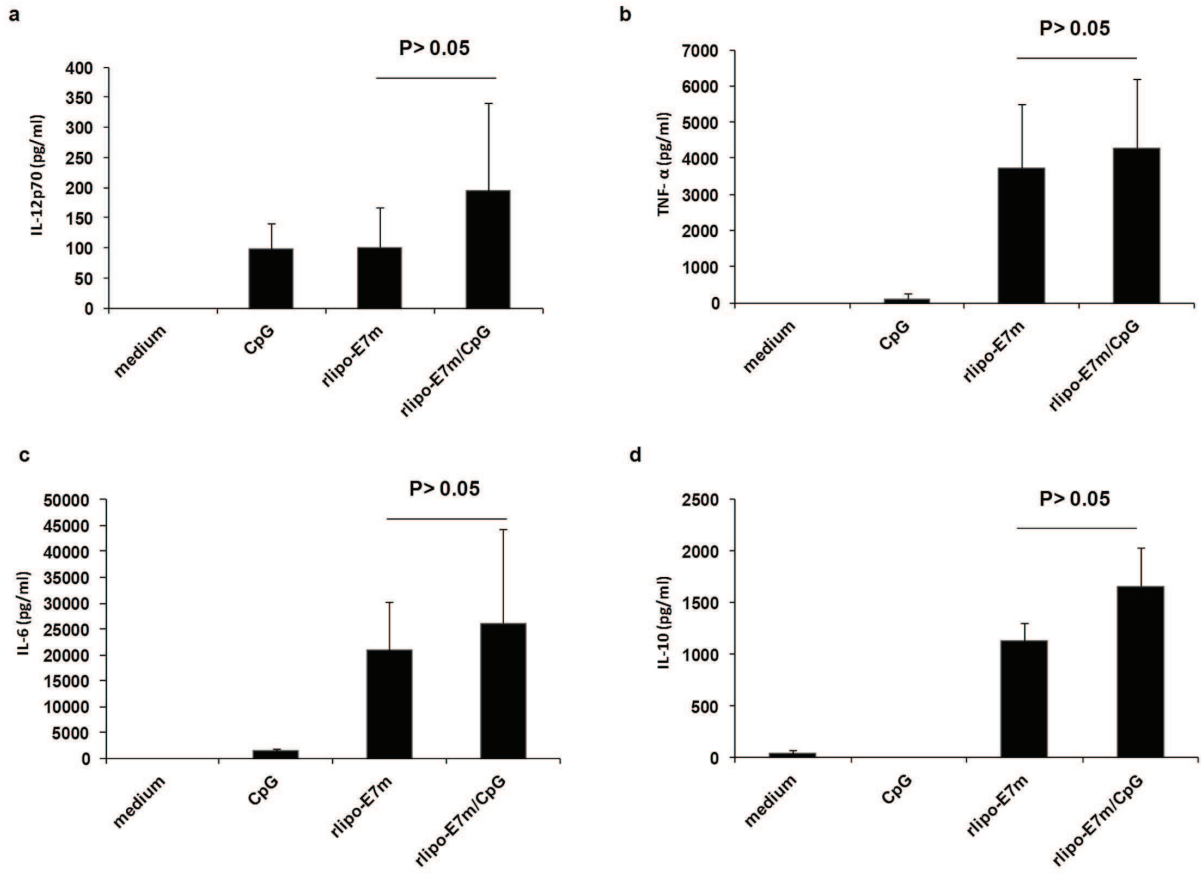

**Figure S5: The combination of the recombinant lipoprotein and CpG ODN shows no synergistic effects on BMDCs activation.** Mouse bone marrow-derived BMDCs at 6 days after GM-CSF supplementation were used to evaluate synergistic effects of innate immune cell activation induced through ripo-E7m in combination with CpG ODN. The BMDC supernatants were collected for cytokine detection at 24 h after stimulation. The cytokines IL-12p70, TNF-α, IL-6 and IL-10 were analyzed through ELISA to assess the extent of DCs activation. The presented data represent the mean + SD of duplicate BMDCs cultures from three independent experiments.
